# Supplementary material for: Biodistribution and targeting potential assessment of mucoadhesive chitosan nanoparticles designed for ulcerative colitisviascintigraphy
Source: Royal Society of Chemistry journal article supplement (doi:10.1039/c8ra01898g), 2018-01-01
Supplement: c8ra01898g1.pdf [file c8ra01898g1.pdf]

Standard curve of curcumin through HPLC data

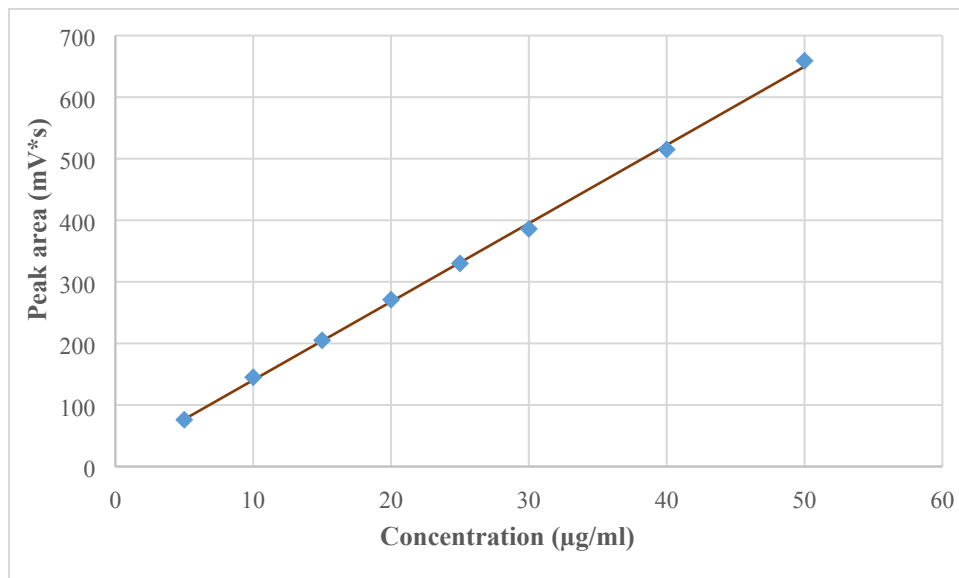

Table showing concentration vs peak area of curcumin and calculated % recovery

| Concentration (µg/ml) | Peak area (mV*s) | Found concentration (µg/ml) | % Recovery  |
|-----------------------|------------------|-----------------------------|-------------|
| 5                     | 76               | 4.943048                    | 98.86095837 |
| 10                    | 145              | 10.36332                    | 103.63315   |
| 15                    | 205              | 15.07659                    | 100.5106049 |
| 20                    | 271              | 20.26119                    | 101.3059701 |
| 25                    | 330              | 24.89592                    | 99.58366064 |
| 30                    | 386              | 29.29497                    | 97.64990835 |
| 40                    | 515              | 39.42852                    | 98.5712883  |
| 50                    | 659              | 50.74038                    | 101.4807541 |
|                       | mean= 8          |                             | 100.1995369 |
|                       | SD               |                             | 1.930028493 |
|                       | SE of intercept  |                             | 4.596292569 |
|                       | SD of intercept  |                             | 13.00027858 |
|                       | LOD              |                             | 3.37006436  |
|                       | LOQ              |                             | 10.21231624 |
